# Supplementary material
Source: PubMed Central journal article supplement (PMC7053009)
Supplement: jcsm.16.1.81.SD1.pdf [file jcsm.16.1.81.SD1.pdf]

**Supplementary Table 1. Adjustment Variables for Healthcare Utilization Regression Models**

|                             |                                                                                                                                                                                                                                                                                                                                                           |
|-----------------------------|-----------------------------------------------------------------------------------------------------------------------------------------------------------------------------------------------------------------------------------------------------------------------------------------------------------------------------------------------------------|
| <b>Inpatient</b>            | Year of diagnosis, age, sex, race, depression, anxiety, Alzheimer's disease and related dementias, asthma, atrial fibrillation, heart failure, chronic kidney disease, chronic obstructive pulmonary disease, diabetes, hyperlipidemia, hypertension, ischemic heart disease, osteoporosis, stroke, Deyo Charlson comorbidity index                       |
| <b>Emergency Department</b> | Year of diagnosis, age, sex, race, depression, anxiety, Alzheimer's disease and related dementias, asthma, atrial fibrillation, heart failure, chronic kidney disease, chronic obstructive pulmonary disease, diabetes, hyperlipidemia, hypertension, ischemic heart disease, osteoporosis, stroke, Deyo Charlson comorbidity index                       |
| <b>Outpatient</b>           | Year of diagnosis, age, sex, race, depression, anxiety, Alzheimer's disease and related dementias, asthma, atrial fibrillation, heart failure, chronic kidney disease, chronic obstructive pulmonary disease, diabetes, hyperlipidemia, hypertension, ischemic heart disease, osteoporosis, rheumatoid arthritis, stroke, Deyo Charlson comorbidity index |
| <b>Prescriptions</b>        | Year of diagnosis, age, sex, race, depression, anxiety, Alzheimer's disease and related dementias, asthma, atrial fibrillation, heart failure, chronic kidney disease, chronic obstructive pulmonary disease, diabetes, hyperlipidemia, hypertension, ischemic heart disease, osteoporosis, rheumatoid arthritis, stroke, Deyo Charlson comorbidity index |

**Supplementary Table 2. Adjustment Variables for Costs Regression Models**

|                             |                                                                                                                                                                                                                                                                                                                                                                          |
|-----------------------------|--------------------------------------------------------------------------------------------------------------------------------------------------------------------------------------------------------------------------------------------------------------------------------------------------------------------------------------------------------------------------|
| <b>Inpatient</b>            | Year of diagnosis, age, sex, race, depression, anxiety, myocardial infarction, anemia, asthma, atrial fibrillation, chronic kidney disease, diabetes, heart failure, hyperlipidemia, hypertension, ischemic heart disease, osteoporosis, stroke, Deyo Charlson comorbidity index                                                                                         |
| <b>Emergency Department</b> | Year of diagnosis, age, sex, race, depression, anxiety, myocardial infarction, Alzheimer's disease and related dementias, anemia, asthma, atrial fibrillation, heart failure, chronic kidney disease, chronic obstructive pulmonary disease, diabetes, hypertension, ischemic heart disease, rheumatoid arthritis, osteoporosis, stroke, Deyo Charlson comorbidity index |
| <b>Outpatient</b>           | Year of diagnosis, age, sex, race, depression, anxiety, myocardial infarction, anemia, atrial fibrillation, heart failure, chronic kidney disease, chronic obstructive pulmonary disease, diabetes, hyperlipidemia, hypertension, ischemic heart disease, rheumatoid arthritis, stroke, Deyo Charlson comorbidity index                                                  |
| <b>Prescriptions</b>        | Year of diagnosis, age, sex, race, depression, anxiety, Alzheimer's disease and related dementias, anemia, asthma, atrial fibrillation, heart failure, chronic kidney disease, chronic obstructive pulmonary disease, diabetes, hypertension, ischemic heart disease, rheumatoid arthritis, osteoporosis, stroke, Deyo Charlson comorbidity index                        |
| <b>Total</b>                | Year of diagnosis, age, sex, race, depression, anxiety, myocardial infarction, Alzheimer's disease and related dementias, anemia, asthma, atrial fibrillation, heart failure, chronic kidney disease, chronic obstructive pulmonary disease, diabetes, hypertension, ischemic heart disease, rheumatoid arthritis, osteoporosis, stroke, Deyo Charlson comorbidity index |
